# Supplementary material for: CuAAC synthesis of resorcin[4]arene-based glycoclusters as multivalent ligands of lectins
Source: Royal Society of Chemistry journal article supplement (doi:10.1039/c1ob05676j), 2011-01-01
Supplement: c1ob05676j.pdf [file c1ob05676j.pdf]

## CuAAC Synthesis of Resorcin[4]arene-based glycoclusters as multivalent ligands of lectins

Zahid H. Soomro,<sup>a,b</sup> Samy Cecioni,<sup>c,d</sup> Helen Blanchard,<sup>e</sup> Jean-Pierre Praly,<sup>c</sup> Anne Imberty,<sup>d</sup> Sébastien Vidal,<sup>\*c</sup> Susan E. Matthews<sup>\*a</sup>

<sup>a</sup> School of Pharmacy, University of East Anglia, Norwich, NR4 7TJ, UK Fax 44 1603-592003; Tel: 44 1603 595986; E-mail: susan.matthews@uea.ac.uk

<sup>b</sup> Institute of Materials and Research, Department of Metallurgy and Materials, Dawood Collge of Engineering and Technology, Karachi, Pakistan.

<sup>c</sup> Institut de Chimie et Biochimie Moléculaires et Supramoléculaires, Laboratoire de Chimie Organique 2 – Glycochimie, UMR 5246, CNRS, Université Claude Bernard Lyon 1, 43 Boulevard du 11 Novembre 1918, F-69622, Villeurbanne, France. E-mail: sebastien.vidal@univ-lyon1.fr

<sup>d</sup> CERMAV – CNRS, affiliated with Université Joseph Fourier and ICMG, BP 53, 38041, Grenoble, France.  
<sup>e</sup> Institute for Glycomics, Gold Coast Campus, Griffith University, Queensland 4222, Australia.

|                                                                                   | Page |
|-----------------------------------------------------------------------------------|------|
| <sup>1</sup> H and <sup>13</sup> C NMR spectra for compound <b>3a</b>             | S2   |
| <sup>1</sup> H and <sup>13</sup> C NMR spectra for compound <b>3b</b>             | S3   |
| ESI-MS spectra for compounds <b>3a</b> and <b>3b</b>                              | S4   |
| <sup>1</sup> H and <sup>13</sup> C NMR spectra for compound <b>5a<sub>G</sub></b> | S5   |
| <sup>1</sup> H and <sup>13</sup> C NMR spectra for compound <b>5b<sub>G</sub></b> | S6   |
| <sup>1</sup> H and <sup>13</sup> C NMR spectra for compound <b>5a<sub>L</sub></b> | S7   |
| <sup>1</sup> H and <sup>13</sup> C NMR spectra for compound <b>5b<sub>L</sub></b> | S8   |
| <sup>1</sup> H and <sup>13</sup> C NMR spectra for compound <b>6a<sub>G</sub></b> | S9   |
| <sup>1</sup> H and <sup>13</sup> C NMR spectra for compound <b>6b<sub>G</sub></b> | S10  |
| <sup>1</sup> H and <sup>13</sup> C NMR spectra for compound <b>6a<sub>L</sub></b> | S11  |
| <sup>1</sup> H and <sup>13</sup> C NMR spectra for compound <b>6b<sub>L</sub></b> | S12  |
| <sup>1</sup> H and <sup>13</sup> C NMR spectra for compound <b>8<sub>L</sub></b>  | S13  |
| <sup>1</sup> H and <sup>13</sup> C NMR spectra for compound <b>9<sub>L</sub></b>  | S14  |
| SPR data for compound <b>9<sub>L</sub></b>                                        | S15  |

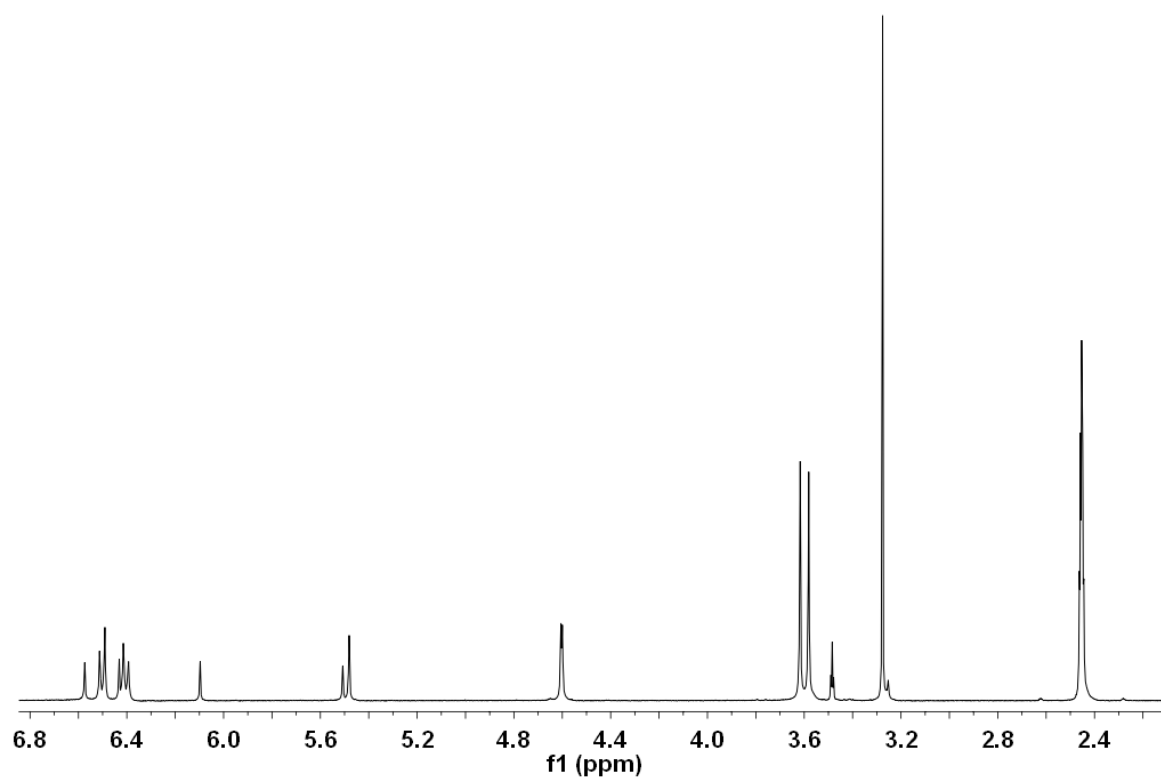

**Figure 1:** Full <sup>1</sup>H NMR (400 MHz, DMSO-*d*<sub>6</sub>) of chair *rctt* **3a**

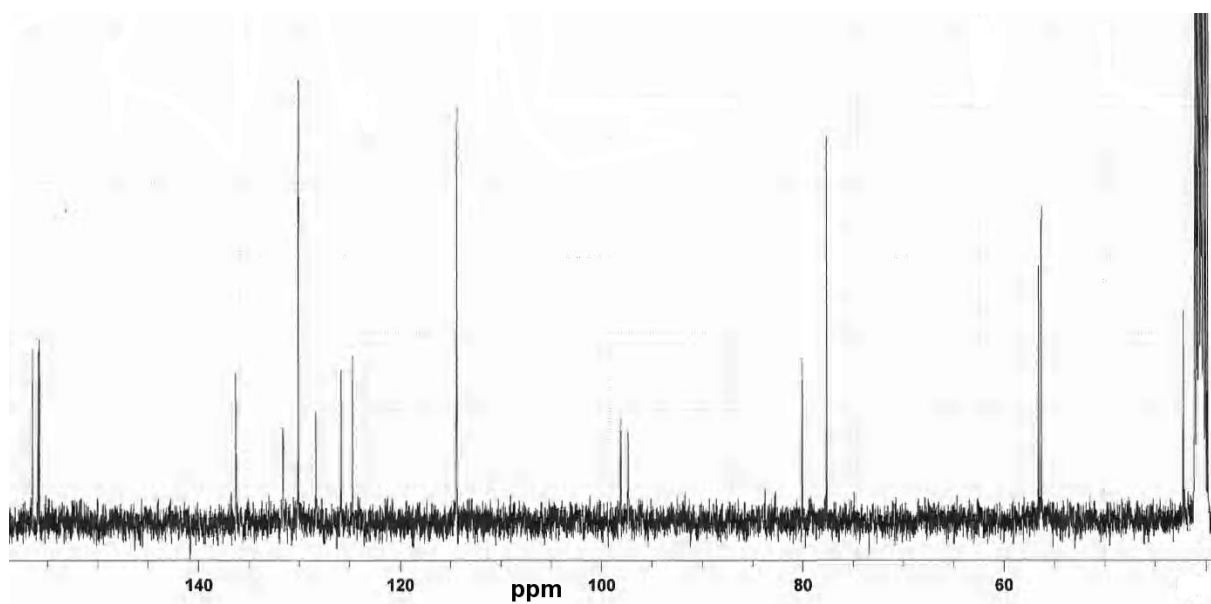

**Figure 2:** Full <sup>13</sup>C NMR (100 MHz, DMSO-*d*<sub>6</sub> + ε DMF-*d*<sub>7</sub>, 363K) of chair *rctt* **3a**

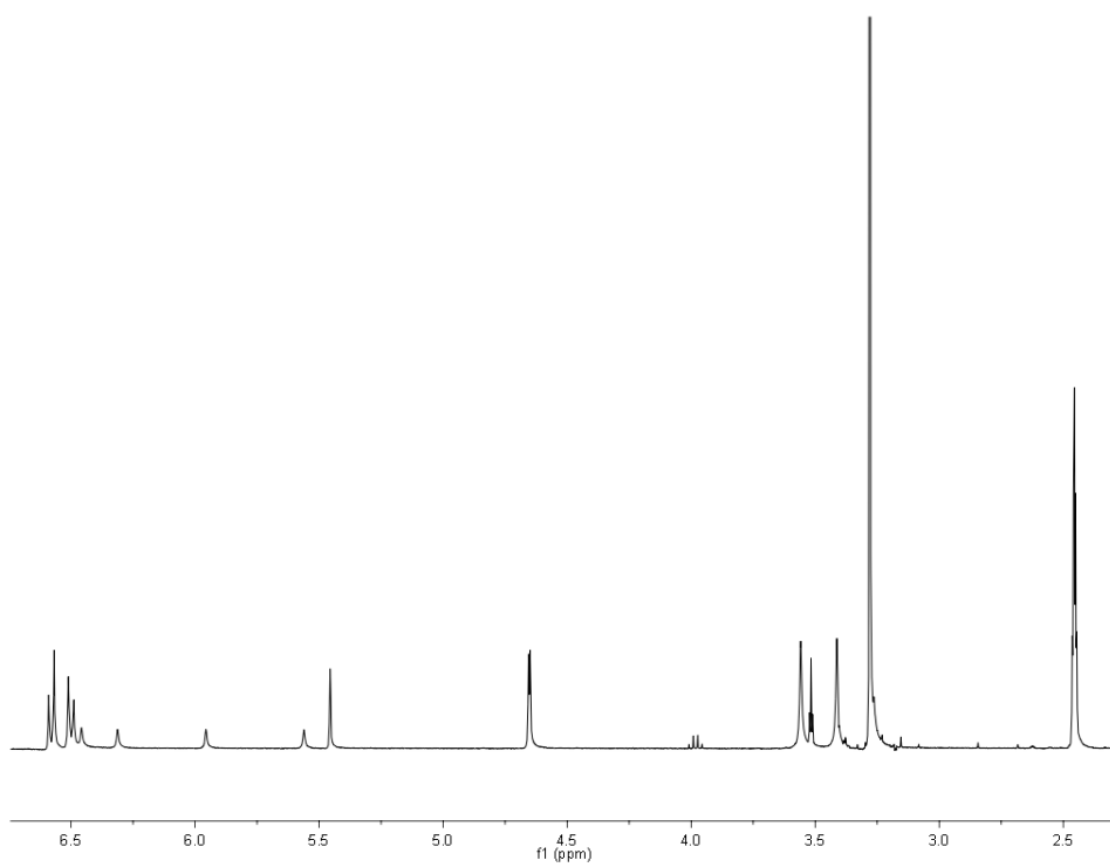

**Figure 3:** Full <sup>1</sup>H NMR (400 MHz, DMSO-*d*<sub>6</sub>) of flattened boat *rccc* **3b**

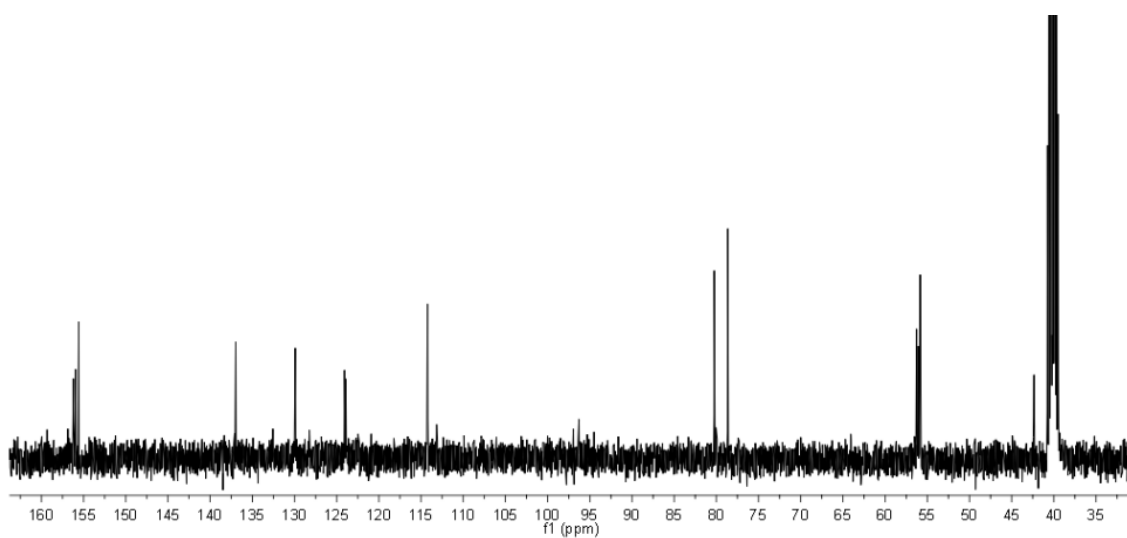

**Figure 4:** Full <sup>13</sup>C NMR (100 MHz, DMSO-*d*<sub>6</sub>) of flattened boat *rccc* **3b**

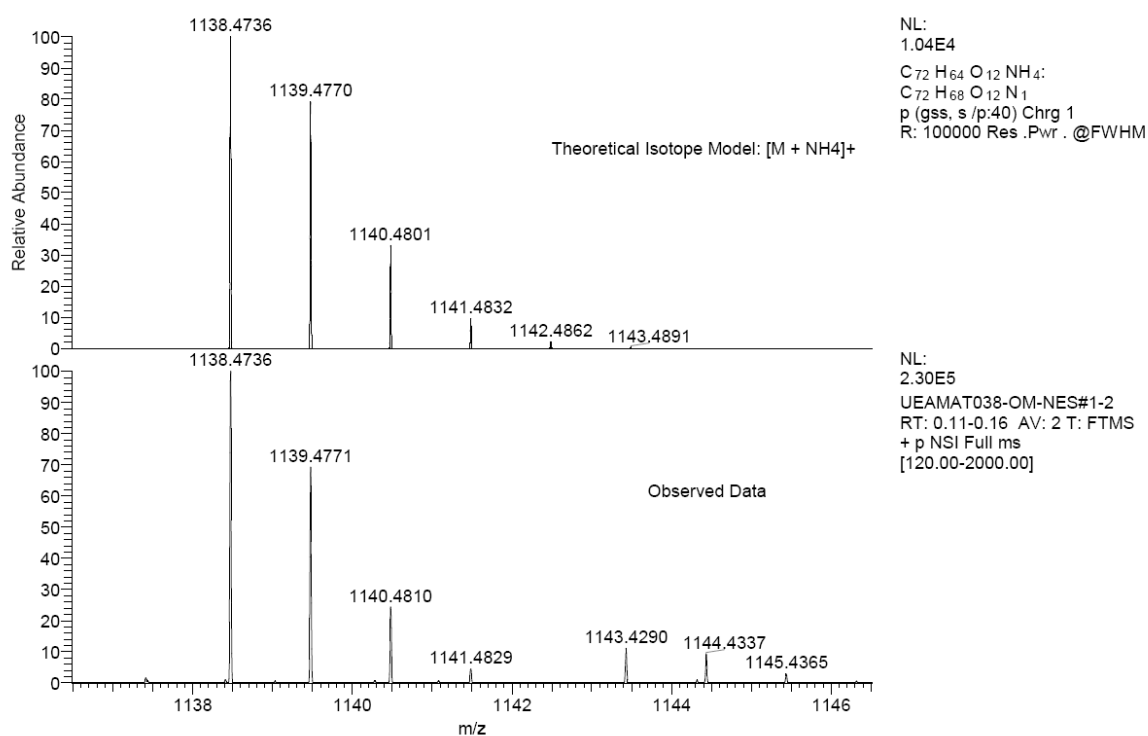

Figure 5: ESI-MS of chair *rctt* **3a**

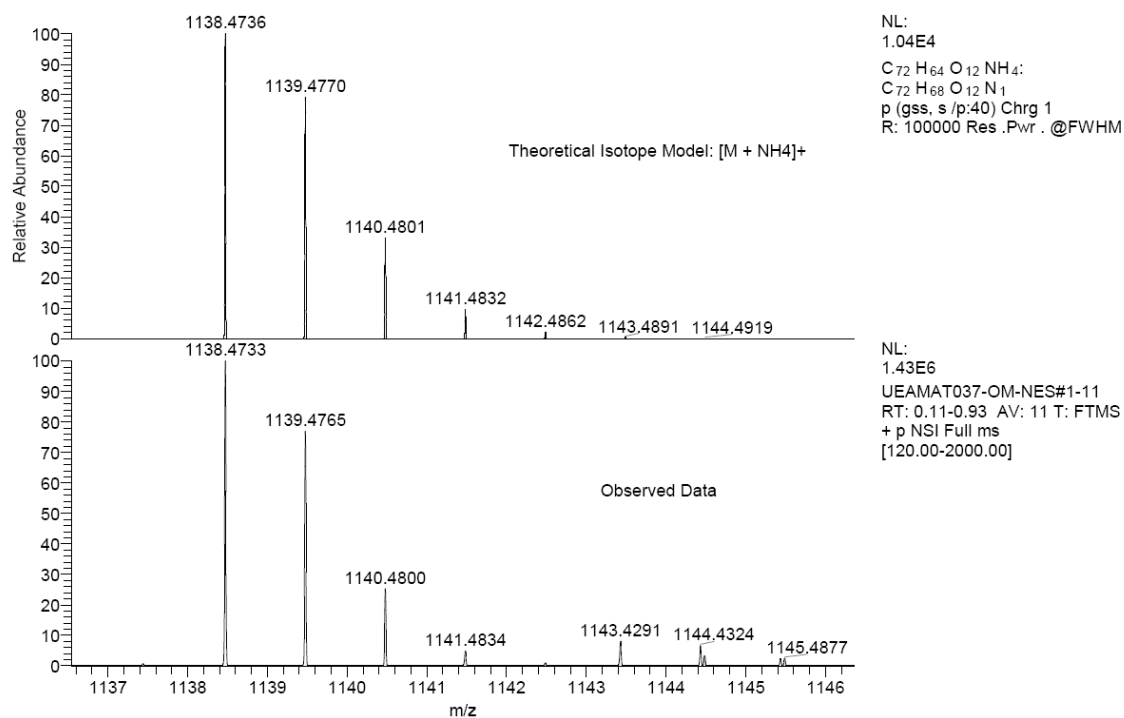

Figure 6: ESI-MS of flattened boat *rcc* **3b**

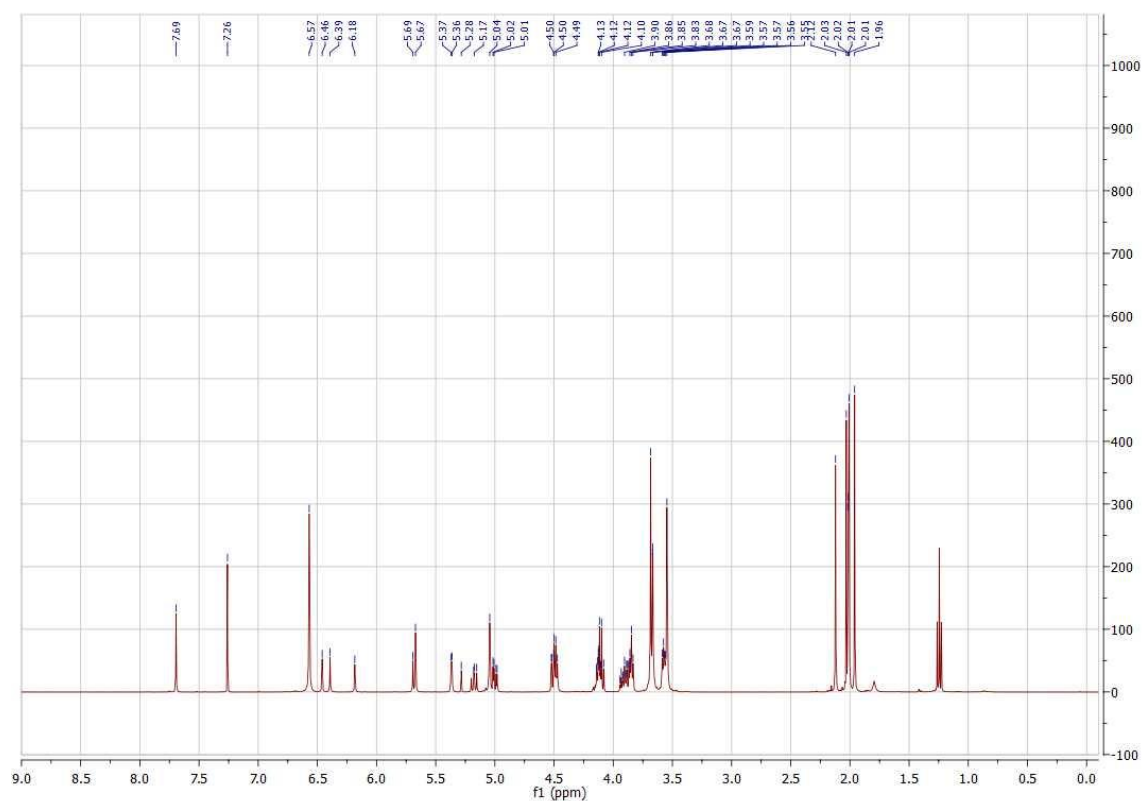

**Figure 7:** Full  $^1\text{H}$  NMR (400 MHz,  $\text{CDCl}_3$ ) Tetra  $(\text{AcO})_4\text{GalEG}_3$  Resorcinarene chair - Acetylated Glycocluster **5a<sub>G</sub>**

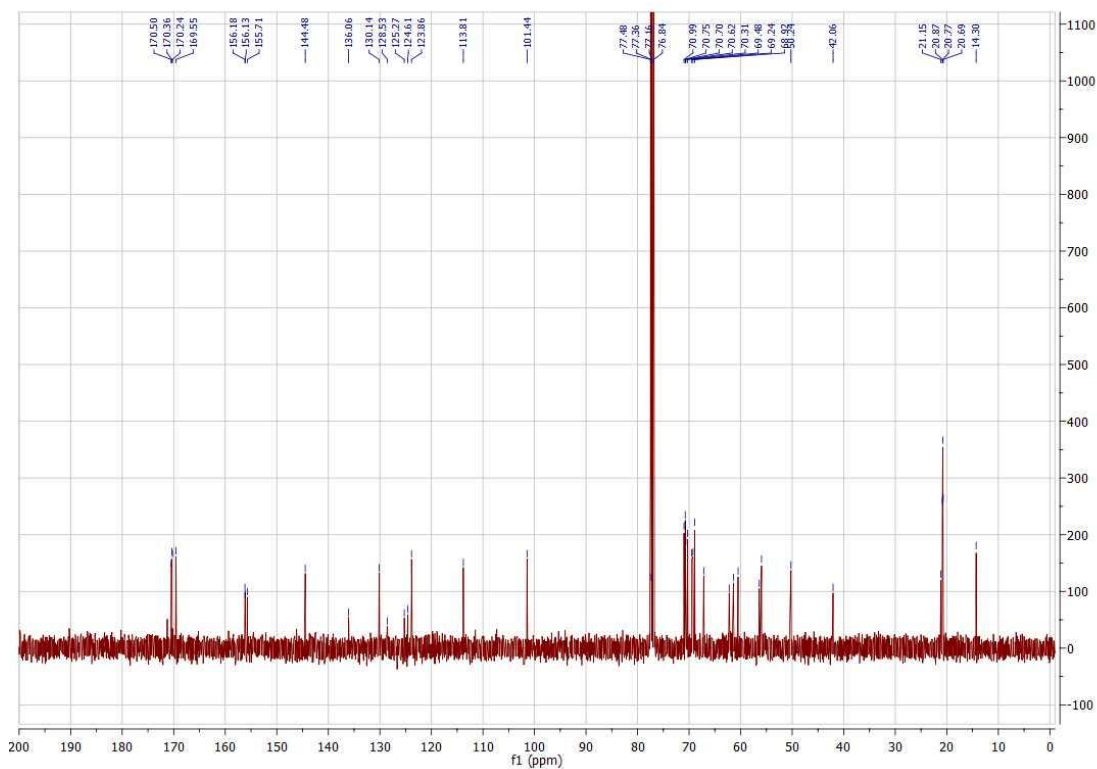

**Figure 8:** Full  $^{13}\text{C}$  NMR (100 MHz,  $\text{CDCl}_3$ ) Tetra  $(\text{AcO})_4\text{GalEG}_3$  Resorcinarene chair - Acetylated Glycocluster **5a<sub>G</sub>**

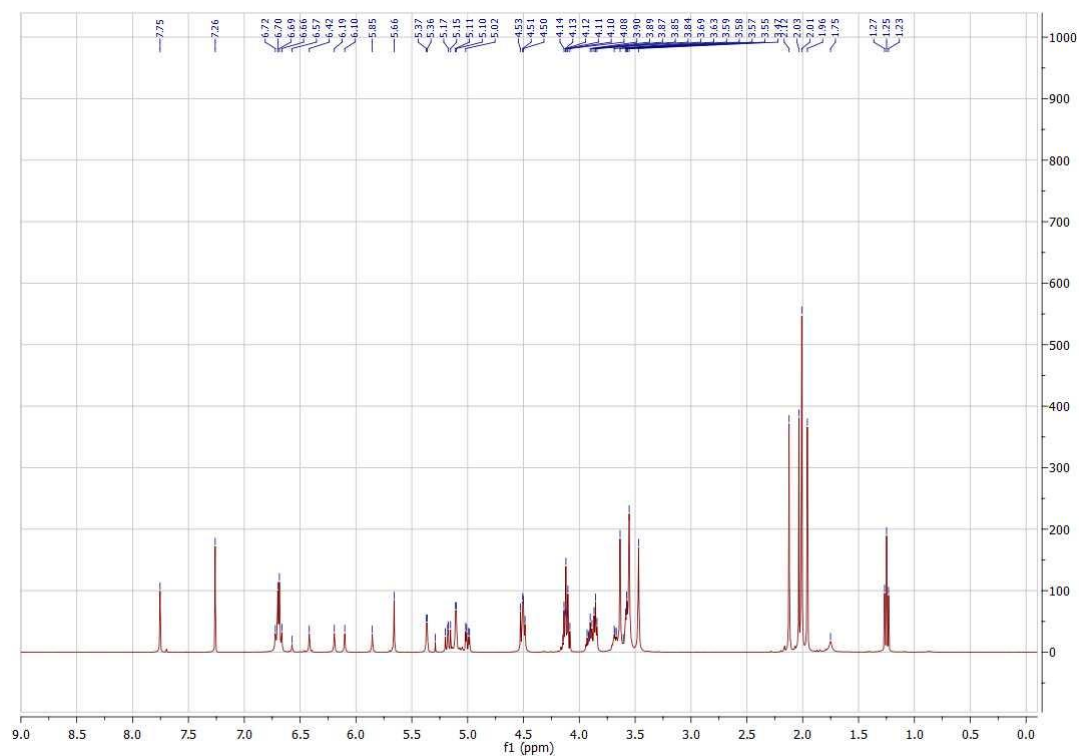

**Figure 9:** Full  $^1\text{H}$  NMR (400 MHz,  $\text{CDCl}_3$ ) Tetra  $(\text{AcO})_4\text{GalEG}_3$  Resorcinarene boat - Acetylated Glycocluster **5b<sub>G</sub>**

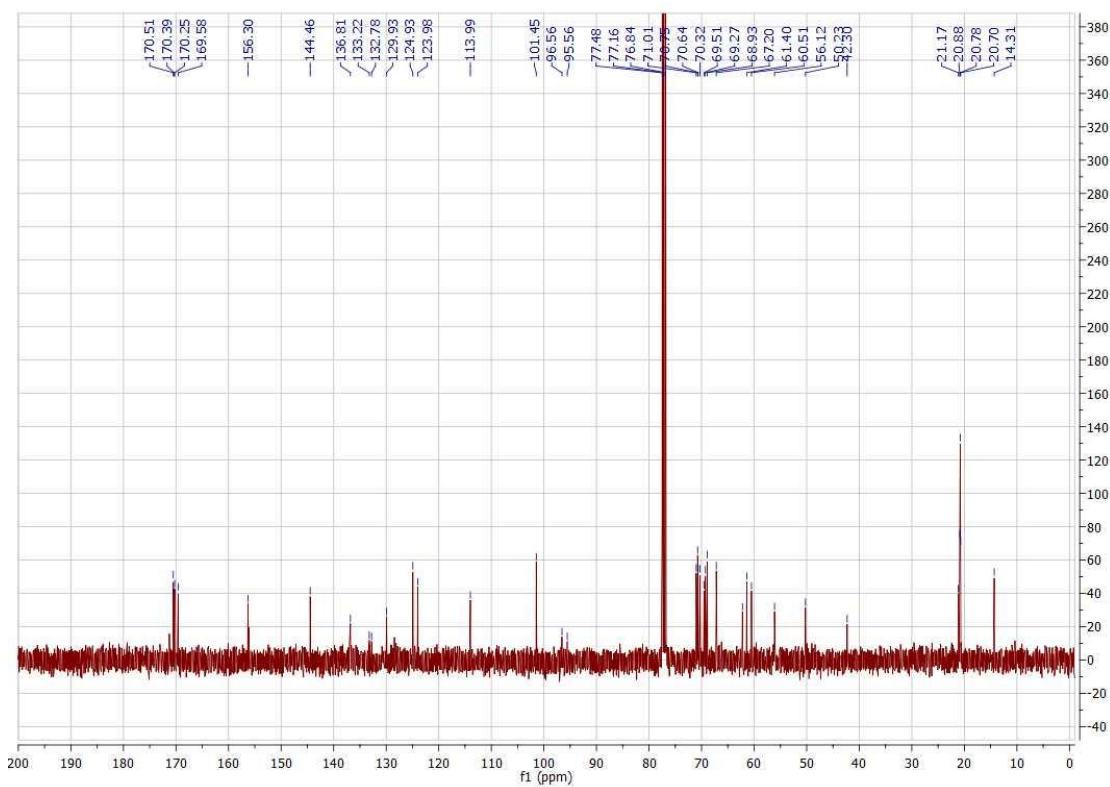

**Figure 10:** Full  $^{13}\text{C}$  NMR (100 MHz,  $\text{CDCl}_3$ ) Tetra (AcO) $_4$ GalEG $_3$  Resorcinarene boat - Acetylated Glycocluster **5b<sub>G</sub>**

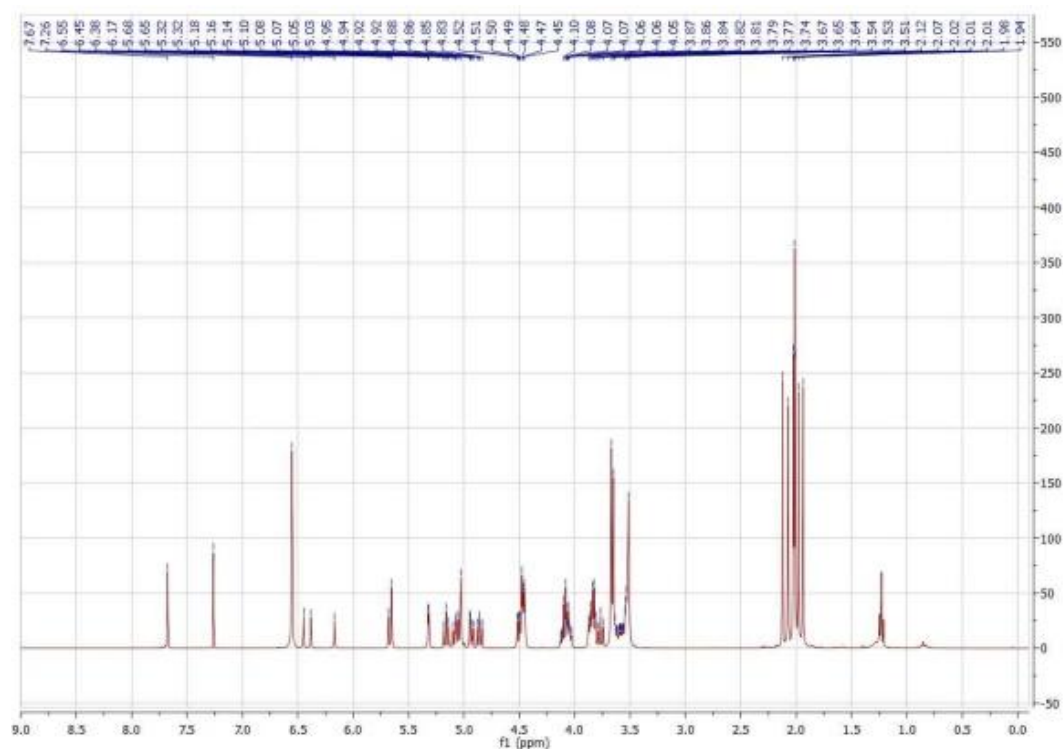

**Figure 11:** Full  $^1\text{H}$  NMR (400 MHz,  $\text{CDCl}_3$ ) Tetra (AcO) $_7$ LacEG $_3$  Resorcinarene chair - Acetylated Glycocluster **5a<sub>L</sub>**

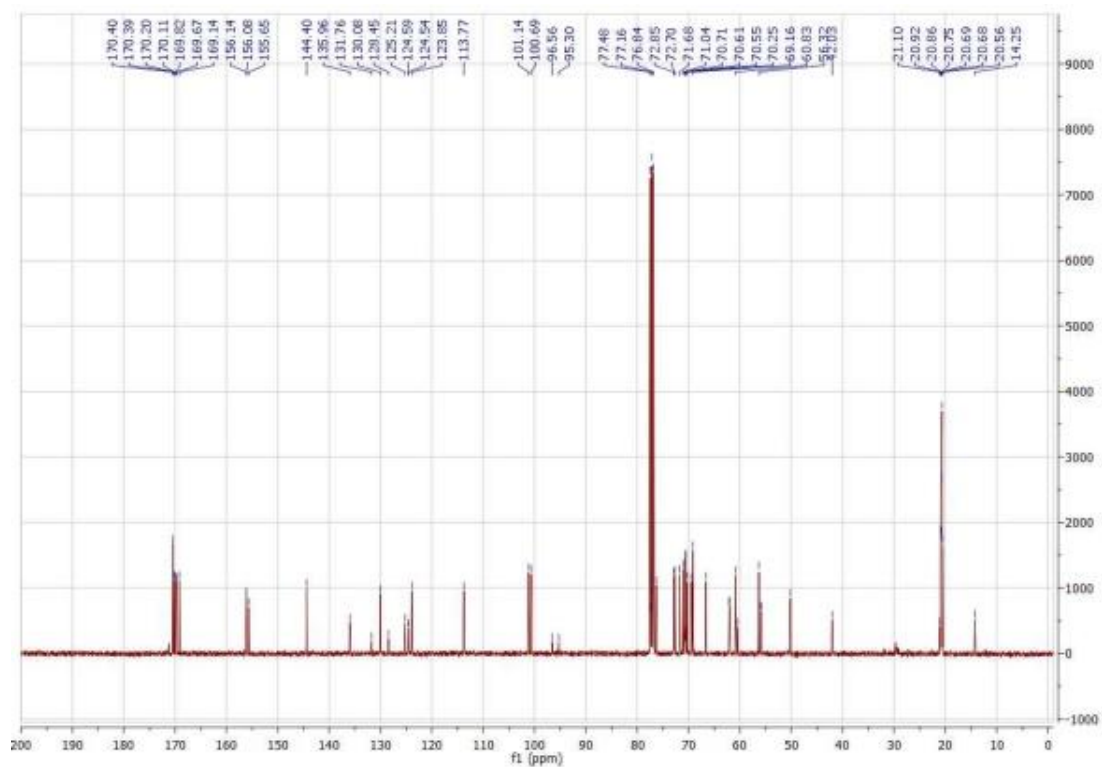

**Figure 12:** Full  $^{13}\text{C}$  NMR (100 MHz,  $\text{CDCl}_3$ ) Tetra (AcO) $_7$ LacEG $_3$  Resorcinarene chair - Acetylated Glycocluster **5a<sub>L</sub>**

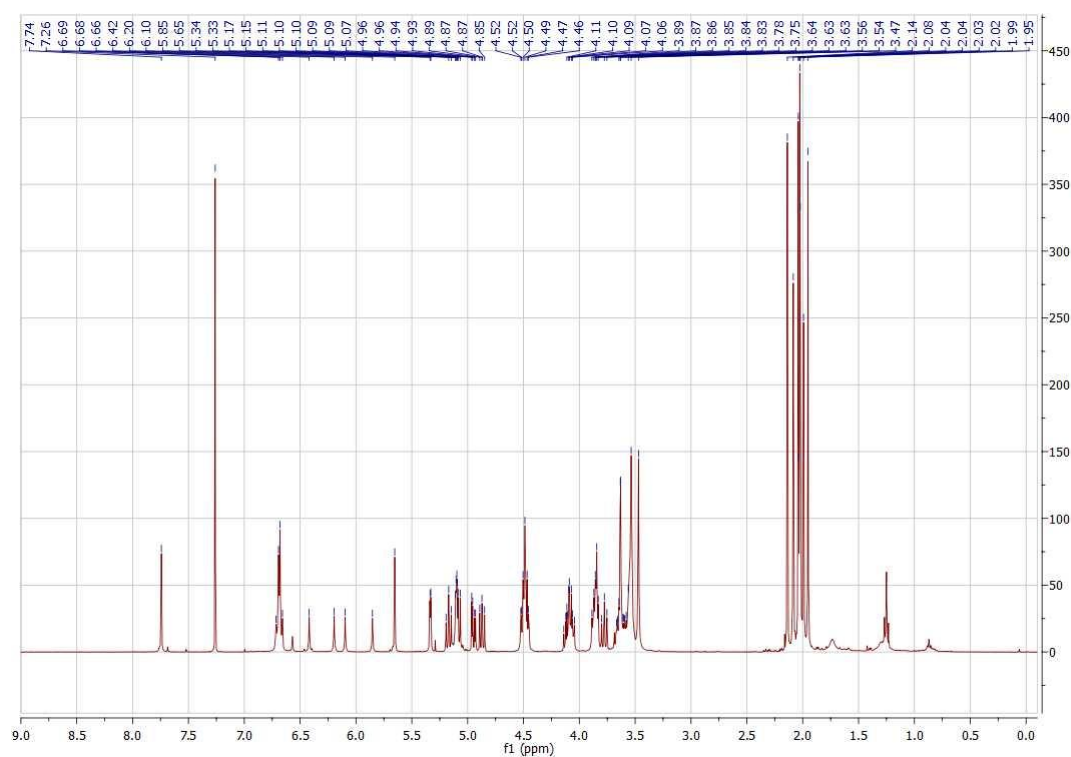

**Figure 13:** Full  $^1\text{H}$  NMR (400 MHz,  $\text{CDCl}_3$ ) Tetra (AcO) $_7$ LacEG $_3$  Resorcinarene boat - Acetylated Glycocluster **5b<sub>L</sub>**

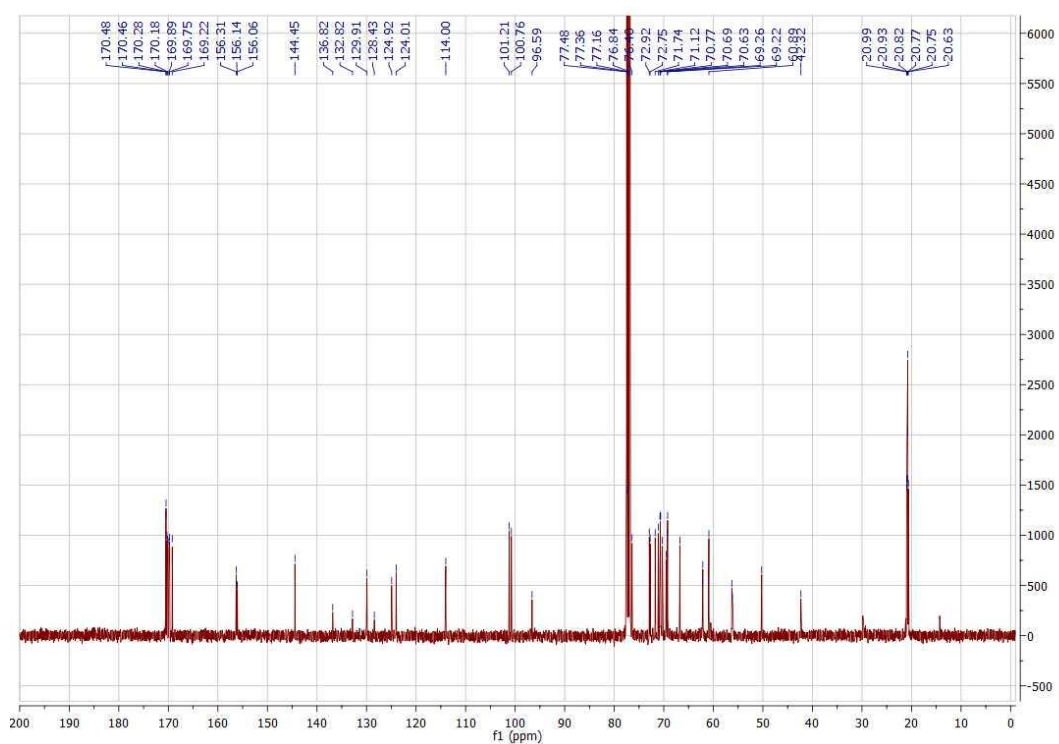



**Figure 14:** Full  $^{13}\text{C}$  NMR (100 MHz,  $\text{CDCl}_3$ ) Tetra (AcO) $_7$ LacEG $_3$  Resorcinarene boat - Acetylated Glycocluster **5b<sub>L</sub>**

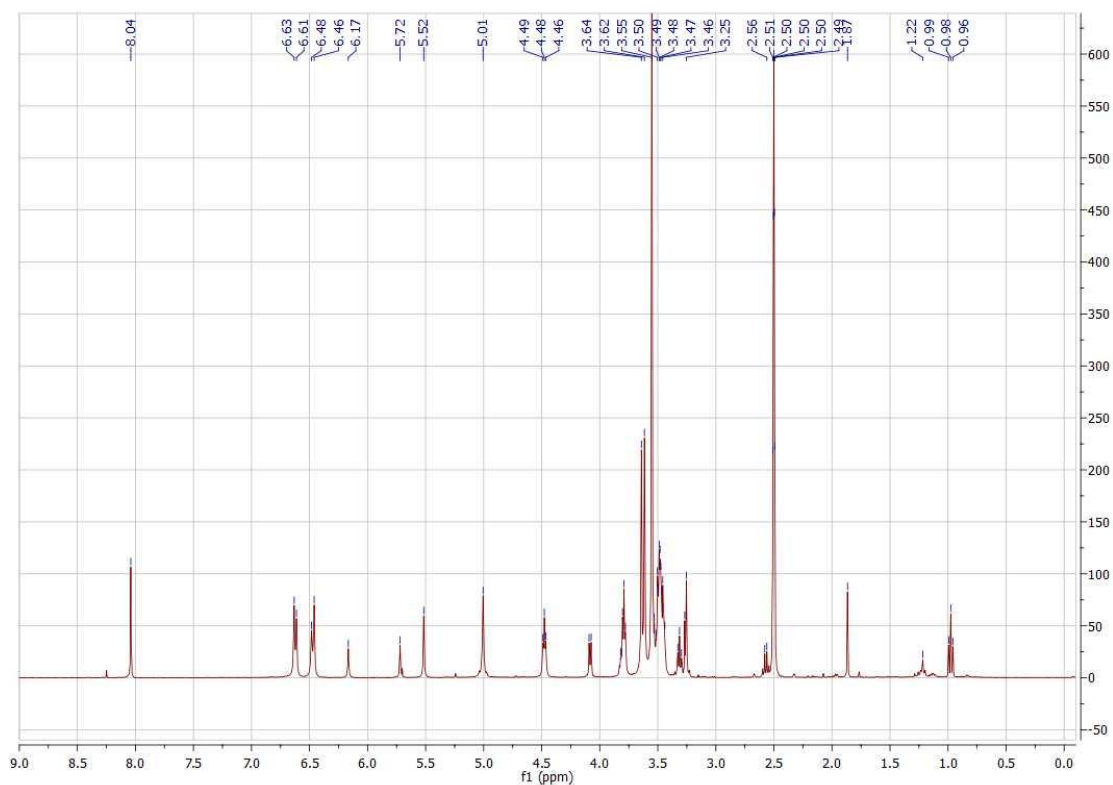

**Figure 15:** Full  $^1\text{H}$  NMR (400 MHz,  $\text{DMSO}-d_6 + \varepsilon \text{D}_2\text{O}$ ) Tetra (HO) $_4$ GalEG $_3$  Resorcinarene chair - Hydroxylated Glycocluster **6a<sub>G</sub>**

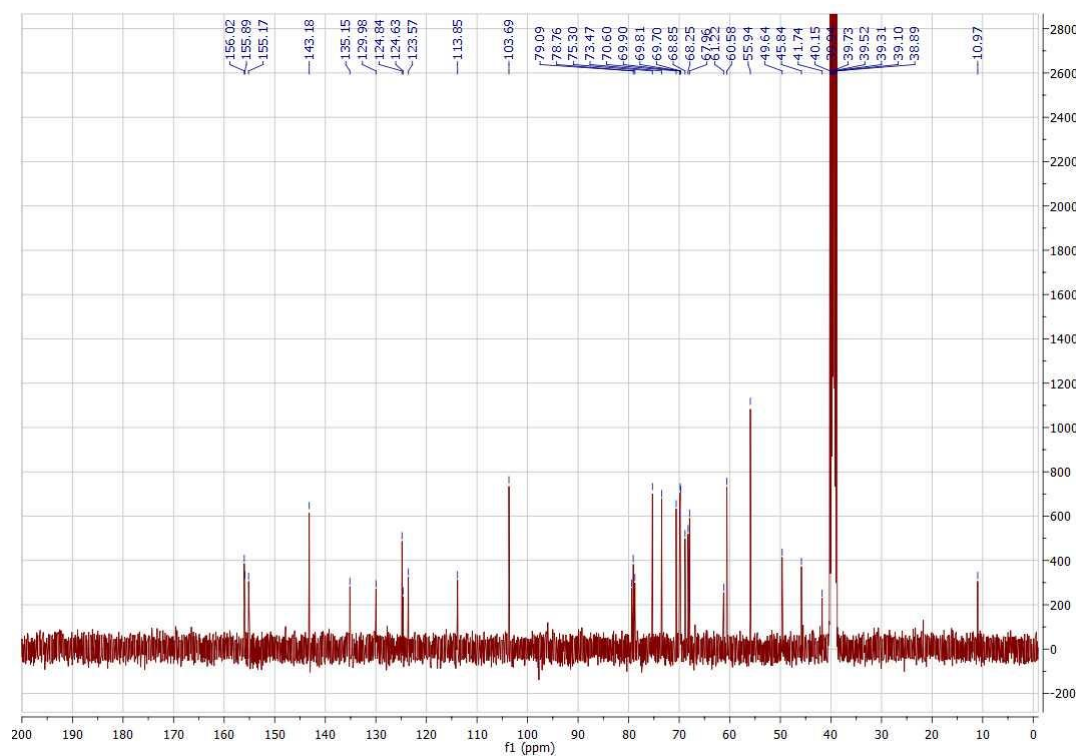

**Figure 16:** Full  $^{13}\text{C}$  NMR (100 MHz,  $\text{DMSO-}d_6 + \varepsilon \text{D}_2\text{O}$ ) Tetra  $(\text{HO})_4\text{GalEG}_3$  Resorcinarene chair - Hydroxylated Glycocluster **6a<sub>C</sub>**

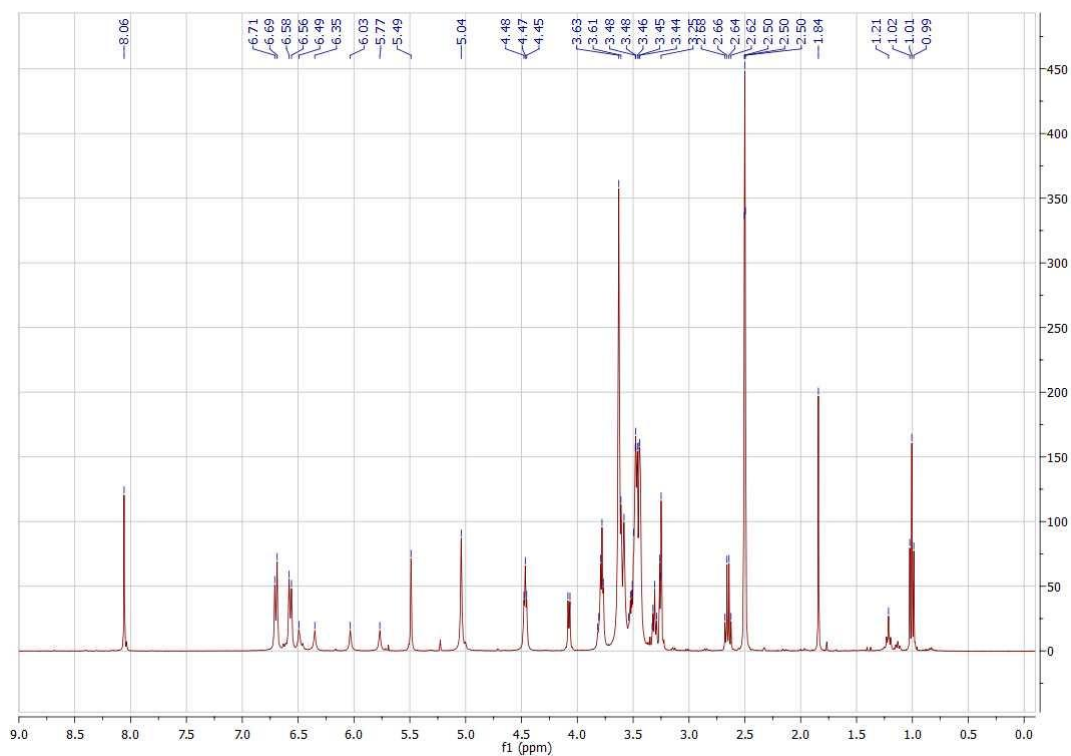

**Figure 17:** Full  $^1\text{H}$  NMR (400 MHz,  $\text{DMSO-}d_6 + \varepsilon \text{D}_2\text{O}$ ) Tetra  $(\text{HO})_4\text{GalEG}_3$  Resorcinarene boat - Hydroxylated Glycocluster **6b<sub>C</sub>**

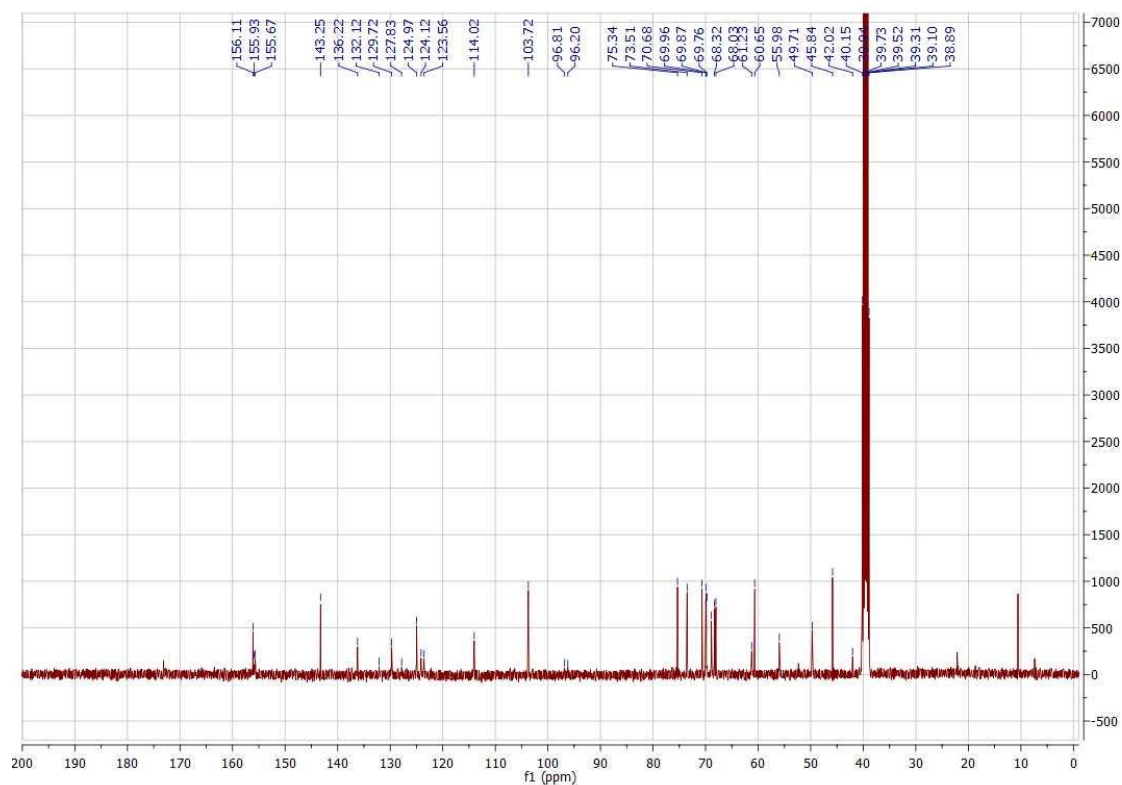

Figur

**e 18:** Full  $^{13}\text{C}$  NMR (100 MHz,  $\text{DMSO-}d_6 + \varepsilon \text{D}_2\text{O}$ ) Tetra  $(\text{HO})_4\text{GalEG}_3$  Resorcinarene boat - Hydroxylated Glycocluster **6b<sub>G</sub>**

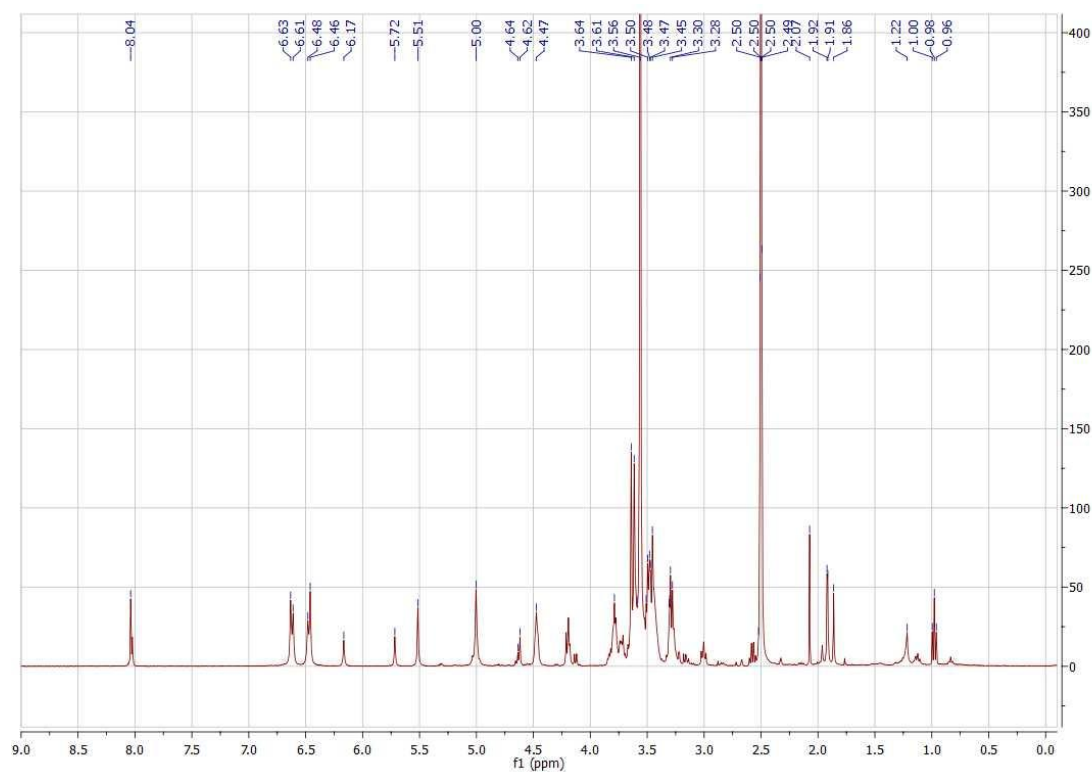

**Figure 19:** Full  $^1\text{H}$  NMR (400 MHz,  $\text{DMSO-}d_6 + \varepsilon \text{D}_2\text{O}$ ) Tetra  $(\text{HO})_7\text{LacEG}_3$  Resorcinarene chair - Hydroxylated Glycocluster **6a<sub>L</sub>**

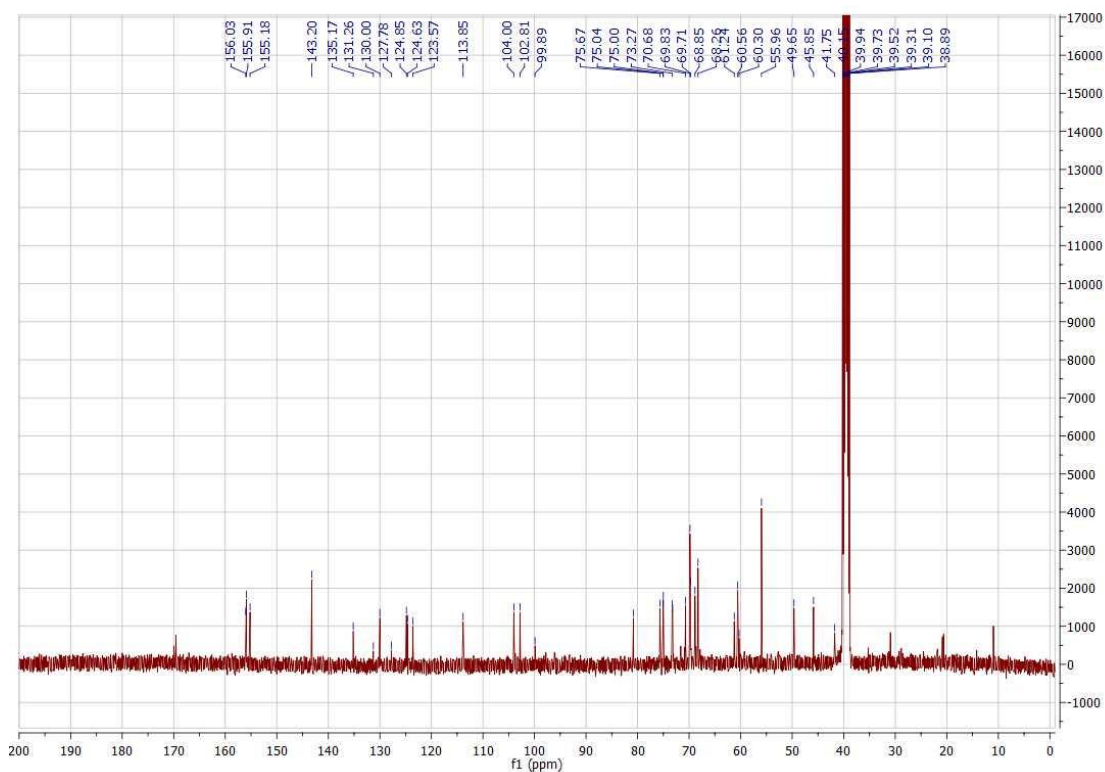

**Figure 20:** Full  $^{13}\text{C}$  NMR (100 MHz,  $\text{DMSO-}d_6 + \varepsilon \text{D}_2\text{O}$ ) Tetra (HO) $_7$ LacEG $_3$  Resorcinarene chair - Hydroxylated Glycocluster **6a<sub>L</sub>**

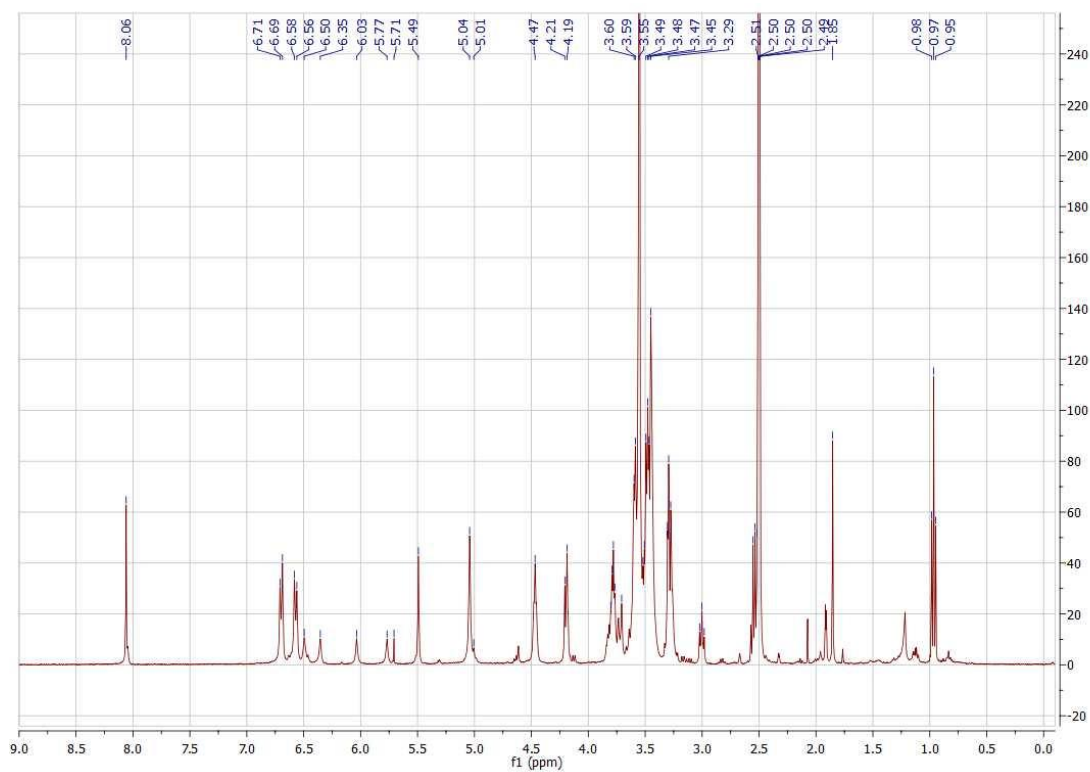

**Figure 21:** Full  $^1\text{H}$  NMR (400 MHz,  $\text{DMSO-}d_6 + \varepsilon \text{D}_2\text{O}$ ) Tetra (HO) $_7$ LacEG $_3$  Resorcinarene boat - Hydroxylated Glycocluster **6b<sub>L</sub>**

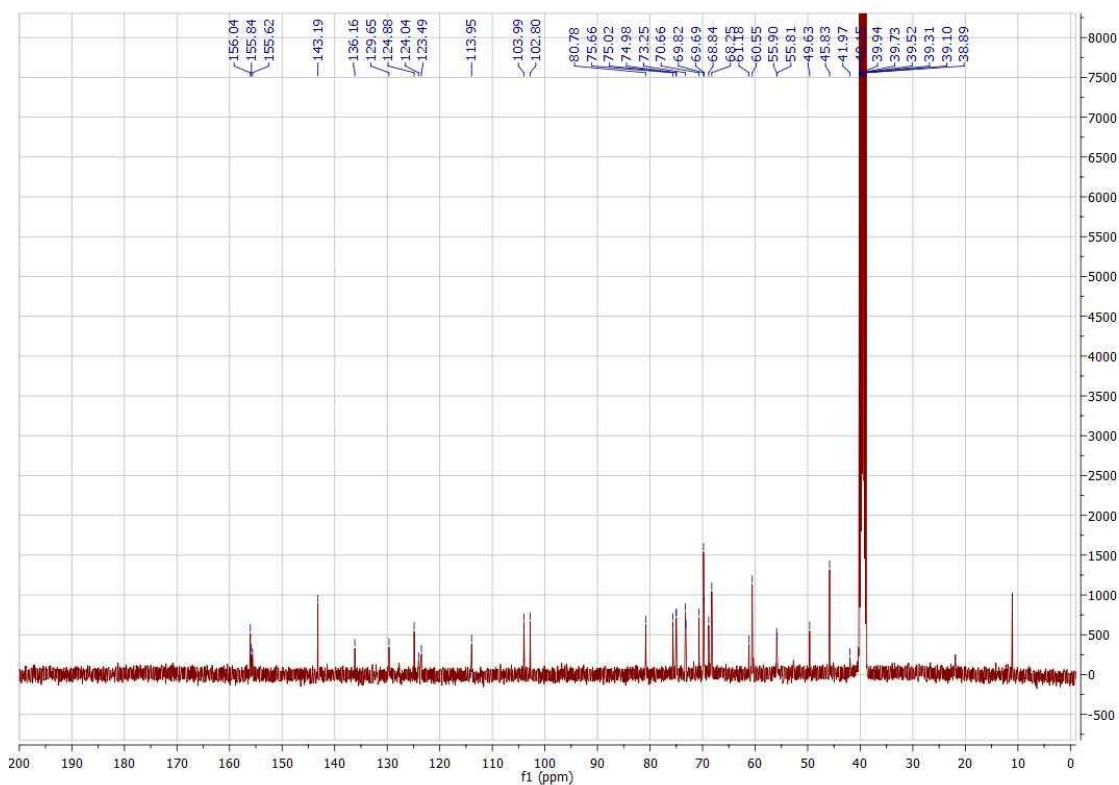

**Figure 22:** Full  $^{13}\text{C}$  NMR (100 MHz,  $\text{DMSO-}d_6 + \varepsilon \text{D}_2\text{O}$ ) Tetra (HO) $_7$ LacEG $_3$  Resorcinarene boat - Hydroxylated Glycocluster **6b<sub>L</sub>**

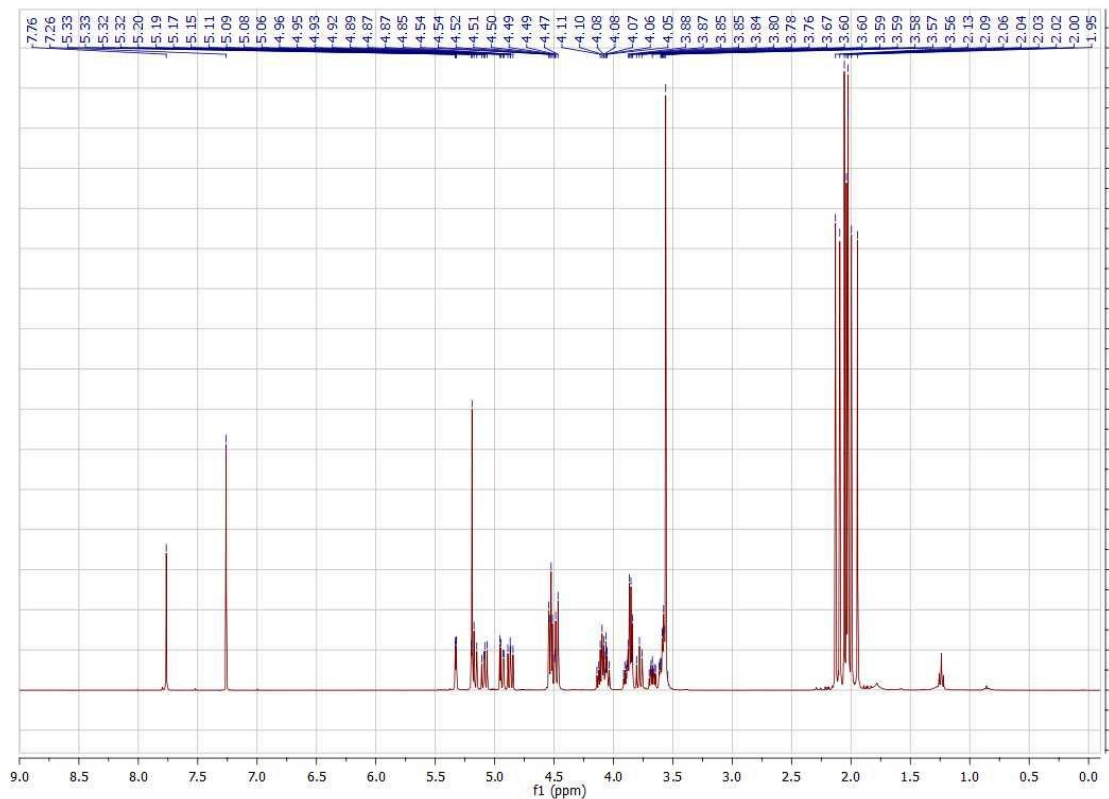

**Figure 23:** Full  $^1\text{H}$  NMR (400 MHz,  $\text{CDCl}_3$ ) 1-[1,2,3-Triazol-4-yl-(acetoxy)methyl]-3,6-dioxaoct-8-yl 2,3,6,2',3',4',6'-hepta-*O*-acetyl- $\beta$ -D-lactoside **8<sub>L</sub>**

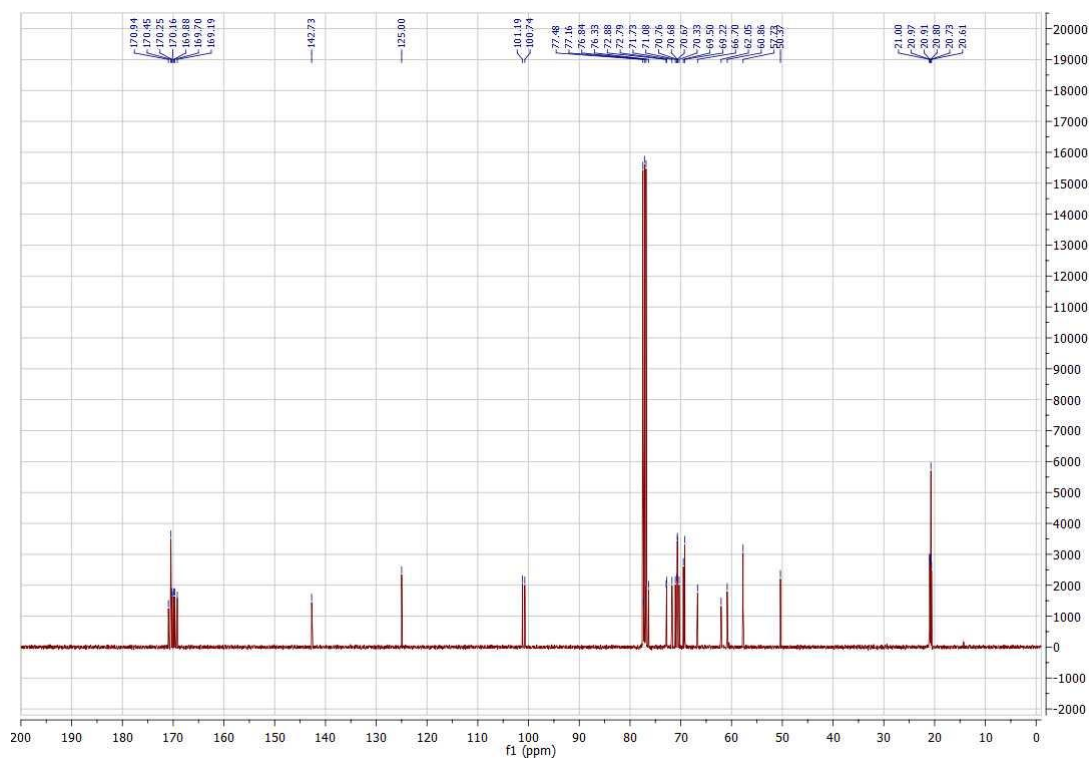

**Figure 24:** Full  $^{13}\text{C}$  NMR (100 MHz,  $\text{CDCl}_3$ ) 1-[1,2,3-Triazol-4-yl-(acetoxy)methyl]-3,6-dioxaoct-8-yl 2,3,6,2',3',4',6'-hepta-*O*-acetyl- $\beta$ -D-lactoside **8<sub>L</sub>**

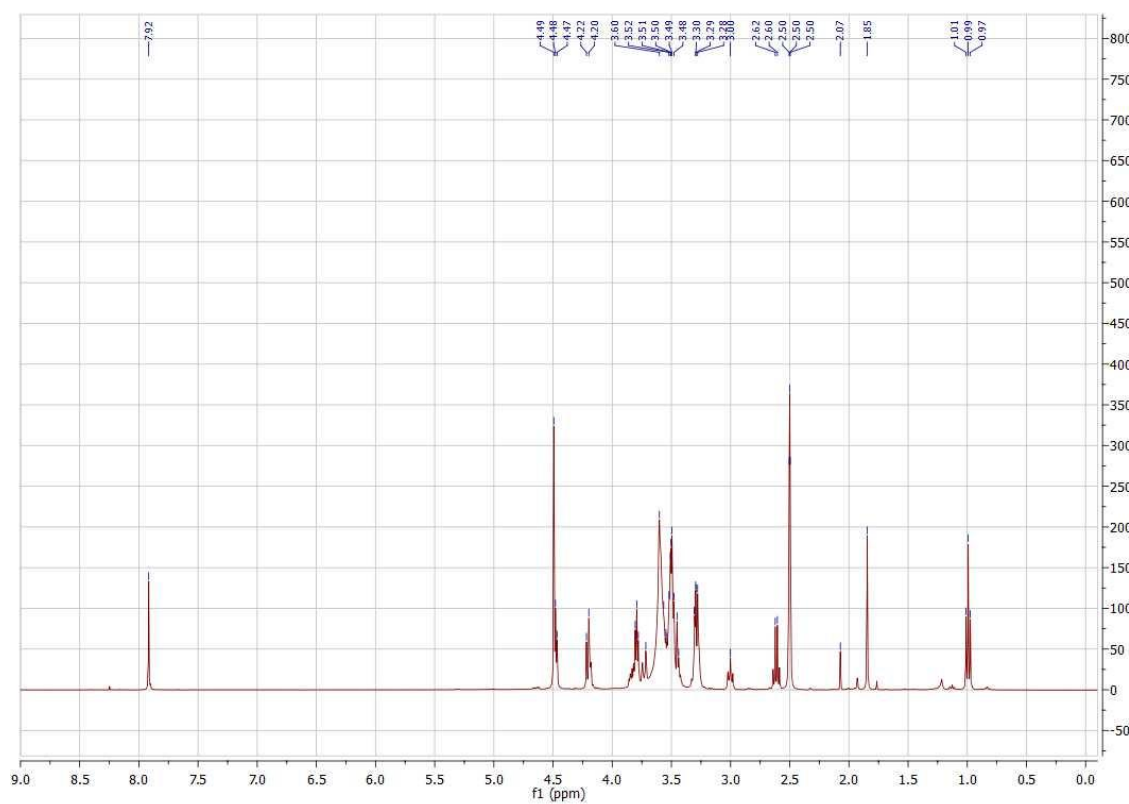

**Figure 25:** Full  $^1\text{H}$  NMR (400 MHz,  $\text{DMSO-}d_6 + \epsilon \text{ D}_2\text{O}$ ) 1-[1,2,3-Triazol-4-yl-(hydroxy)methyl]-3,6-dioxaoct-8-yl  $\beta$ -D-lactoside **9<sub>L</sub>**

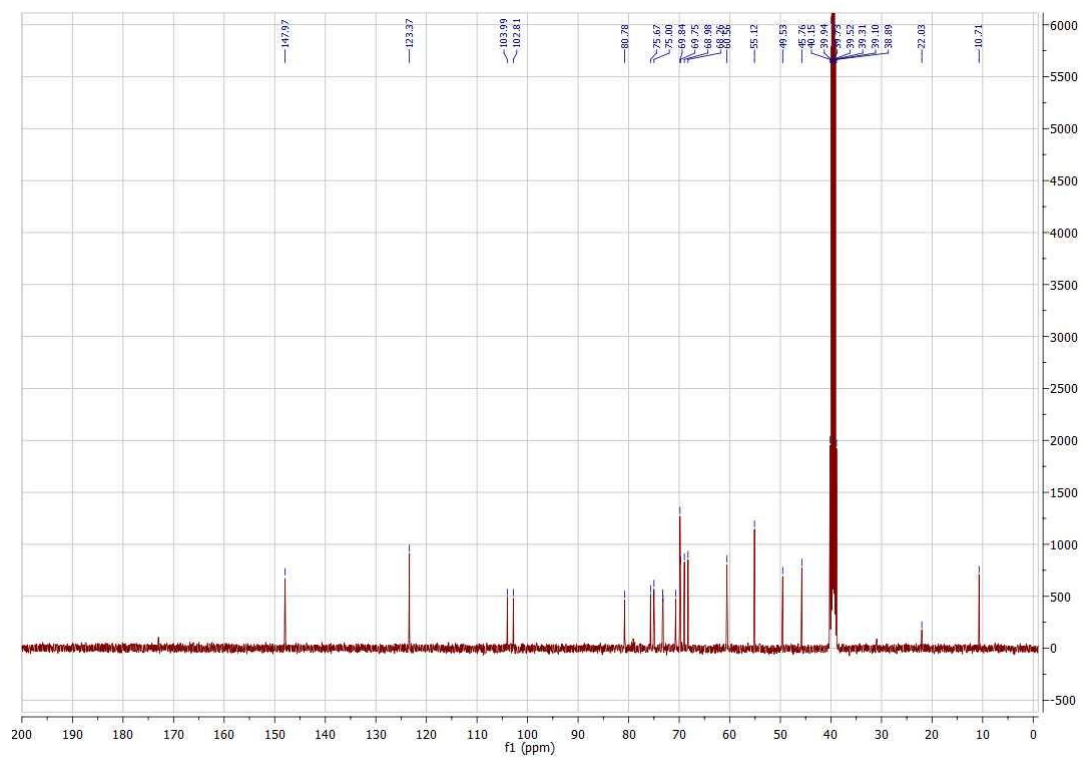

**Figure 26:** Full  $^{13}\text{C}$  NMR (100 MHz,  $\text{DMSO-}d_6 + \epsilon \text{D}_2\text{O}$ ) 1-[1,2,3-Triazol-4-yl-(hydroxy)-methyl]-3,6-dioxaoct-8-yl  $\beta$ -D-lactoside **9<sub>L</sub>**



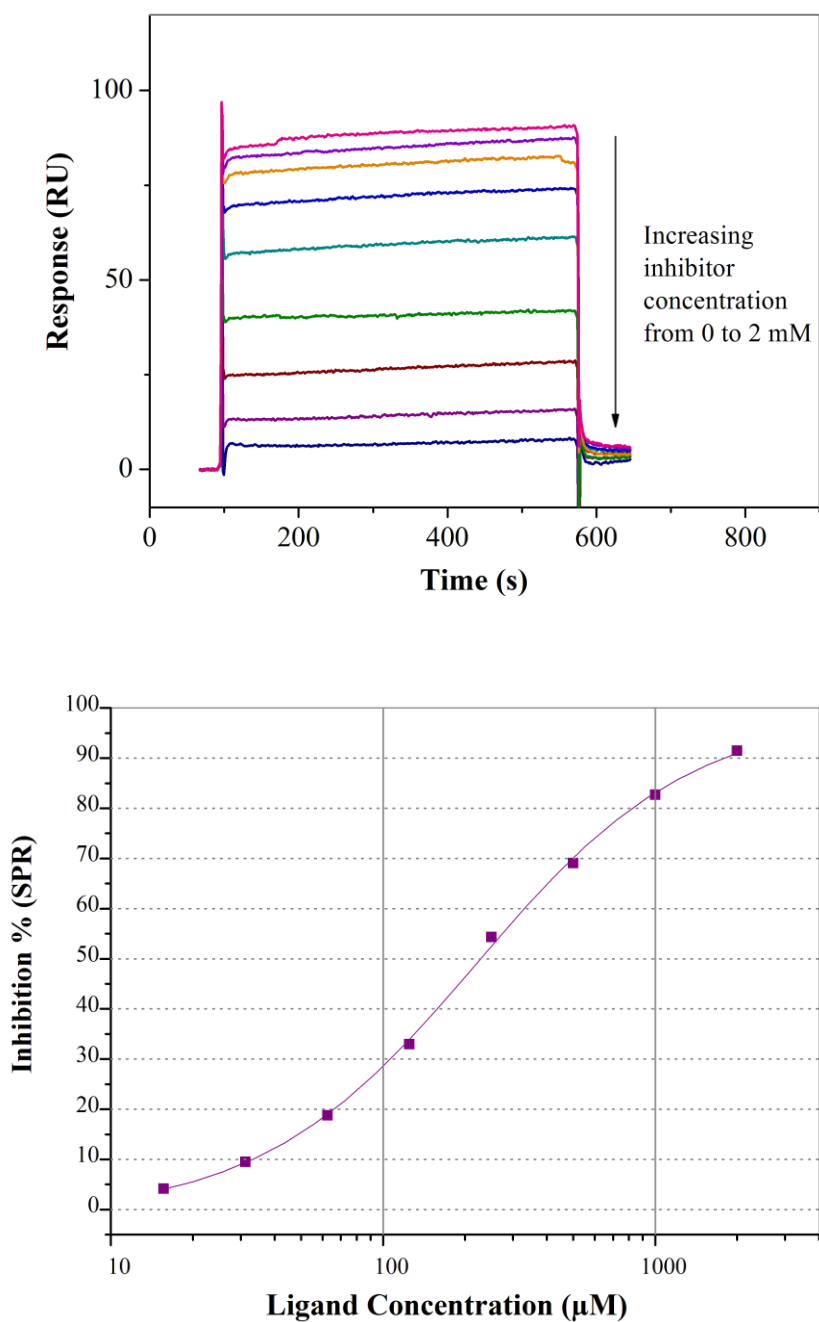

**Figure 27:** SPR sensorgram measured for  $\mathbf{9_L}$  incubated with PA-IL (5  $\mu\text{M}$ ) and injected on a CM5 chip coated with Streptavidin/Biotin-PAA- $\alpha$ -D-Galactose. a) sensorgram, b) corresponding inhibition curve. PAA=Polyacrylamide
